# Supplementary material for: Abrupt change in North African hydroclimate and landscape evolution 3.2 million years ago
Source: Research Square preprint supplement (doi:10.21203/rs.3.rs-579142/v1), 2021-06-21
Supplement: Supplementary file 1 [file 51d7eda8be9fe0aaede7d58b.docx]

**Methods**

**Bulk element geochemistry**. We combine published x-ray fluorescence (XRF) core-scanner data from ODP Site 967 spanning 0-3 Maref.15 with new XRF core-scanner data for the 3-5 Ma interval. Scanning was performed on archive core-sections at MARUMUniversity of Bremen, on an Avaatech XRF core scanner. Core sections were covered with 4 mm-thick Ultralene film and measured at 50 and 30 kV with 0.55 mA current and with a Cu and Pd-thick filter, respectively, and at 10 kV with 0.035 mA current (no filter); count time for all runs was 7 s. Element ‘counts’ for the entire 0-5 Ma interval were converted into element concentrations by multivariate log-ratio calibration75, using published35,76 and new wavelength dispersive (WD)-XRF reference element concentrations (Supplementary Fig. S7, S8). For these, 42 bulk sediment samples were chosen to cover a range of lithologies based on the XRF scan, then 1 cm3 dried ground sample was mixed with a lithium tetraborate/lithium metaborate flux and fused into 39 mm diameter beads. Major element abundances were analysed by WD-XRF using a Bruker S8 Tiger™ spectrometer at Geoscience Australia. Loss on ignition (LOI) was measured by gravimetry after combustion at 1000°C. One in every ten samples was duplicated along with multiple analyses of 3 international standards (NCS DC70306, MAG-1, ML-2) and an internal basalt standard (WG1). Quantification limits for all major element oxides are <0.2% and reproducibility is within 1%.

**ODP967 chronology**. Published age-depth tie-points for the 0-3 Ma interval are based on tuning a principal-component derived sapropel proxy to precession15. Here, we extend the age model to 5 Ma by tuning the Ba/Ti record from XRF core-scanning to precession minima with zero phase lag (Supplementary Fig. S1).

**Environmental magnetism**. ODP967 U-channel samples were sliced at 1-cm intervals into discrete non-magnetic plastic cubes and measured on a 2-G Enterprises cryogenic magnetometer at the Australian National University (ANU). IRM900@120mT was obtained after imparting a 900 mT induction in a direct current field, followed by alternating field (AF) demagnetization in a peak 120 mT field.

**Stable oxygen isotopes (δ18O)**. Bulk sediment samples were washed through 63 m sieves with RO water and the residue was oven dried at 45°C for 24 hours. *Globigerinoides ruber* (white) specimens were picked from the >300 m size fraction, adhering to ‘*sensu stricto*’ morphotypes and size range (±25 m). Picked tests (typically 10-20, depending on abundance) were gently crushed and cleaned by briefly ultrasonicating in methanol, then air dried after decanting the fine suspended matter. Samples were analyzed at ANU using a Thermo Fisher Scientific Delta Advantage mass spectrometer coupled to a Kiel IV carbonate device for sample digestion. Isotope data were normalized to the Vienna Peedee Belemnite (VPDB) scale using NBS-19. External reproducibility (1σ) was always better than 0.08‰.

**Bernoulli aspiration depth (*d*)**. We use values from ref.8 in the equation of ref.77:

where *h1* approximates the depth of the open Eastern Mediterranean (~2000 m), *h2* is the Sicily Sill depth, *u* is the mean outflow velocity in the Sicilian Strait (0.2 m s-1), *y* is the vertical density gradient below the sill depth (0.03 kg m-3 today), *o* is the density of the outflow layer at the sill (~1027 kg m-3), and *g* is acceleration due to gravity (9.81 m s-1). For a 200 and 400 m deeper sill (*h2* = 600 and 800 m), *d* is -900 and -1000 m, respectively. Allowing for a reduced density gradient below sill depth (*y* = 0.02 kg m-3, based on the modern Strait of Gibraltar), *d* is then -1010 and -1160 m, respectively. Thus, Eastern Mediterranean deep-waters below ~1000 m would be poorly ventilated even if the Sicily Sill was 400 m deeper.

**Data analysis**

Change-points and moving standard deviations were calculated using MATLAB built-in functions “findchangepts” and “movcorr”.

**Data availability**

ODP Site 967 data from this study are available at:

**References**

1. Weltje, G.J., Bloemsma, M.R., Tjallingii, R., Heslop, D., Röhl, U. Prediction of geochemical composition from XRF core scanner data: a new multivariate approach including automatic selection of calibration samples and quantification of uncertainties. In: Croudace, I.W., Rothwell, R.G. (Eds.), Micro-XRF Studies of Sediment Cores, vol. 17. Developments in paleoenvironmental research. <http://dx.doi.org/10.1007/978-94-017-9849-5-21> (2015).
2. Konijnendijk, T., Ziegler, M., Lourens, L. Chronological constraints on Pleistocene sapropel depositions from high-resolution geochemical records of ODP sites 967 and 968. *Newsl. Stratigr*. 47, 263e282 (2014).
3. Seim, H., Gregg, M.C. The importance of aspiration and channel curvature in producing strong vertical mixing over a sill. *J. Geophys. Res.* 102, 3451-3472 (1997).
4. Andreetto, F. et al. Freshening of the Mediterranean Salt Giant: controversies and certainties around the terminal (Upper Gypsum and Lago-Mare) phases of the Messinian Salinity Crisis. *Earth-Sci. Rev.* 216, 103577 (2021).
